# Supplementary material for: History of desert dust deposition recorded in the Elbrus ice core
Source: Copernicus journal article supplement (doi:10.5194/acp-2019-411), 2019-05-22
Supplement: Supplementary file 1 [file acp-2019-411-supplement.pdf]

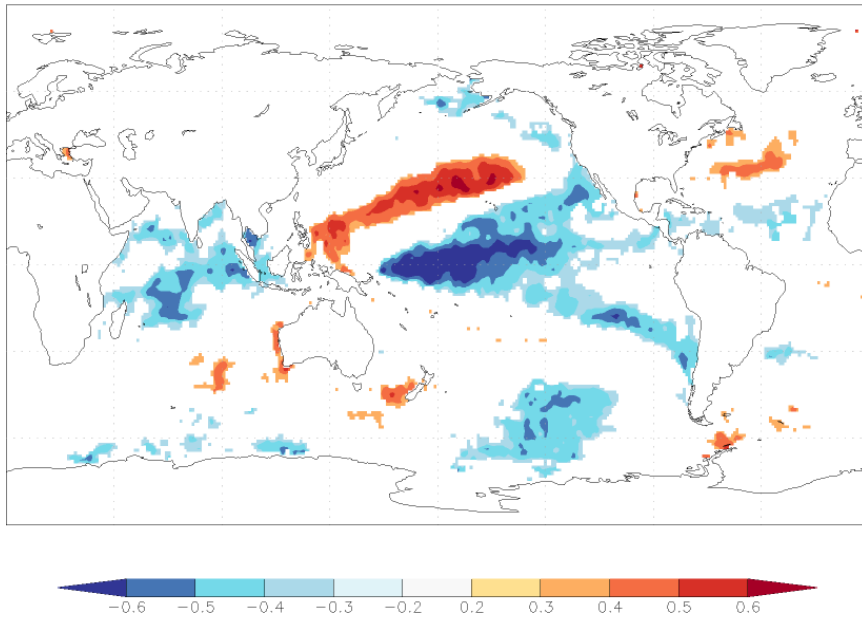

**Figure S1: Correlation between Elbrus  $\text{Ca}^{2+}$  concentrations and the December-March sea-surface temperature over the 1979-2012 period.**
